# Supplementary material for: Energy Homeostasis Gene Nucleotide Variants and Survival of Hemodialysis Patients—A Genetic Cohort Study
Source: MDPI journal article supplement (doi:10.3390/jcm11185477), 2022-09-18
Supplement: s1 [file s1]

## Supplementary Material

### Energy homeostasis gene nucleotide variants and survival of hemodialysis patients – a genetic cohort study

Monika Katarzyna Świdarska <sup>1,2,\*</sup>, Adrianna Mostowska <sup>3</sup>, Damian Skrypnik <sup>4</sup>, Paweł Piotr Jagodziński <sup>3</sup>, Paweł Bogdański <sup>4</sup> and Alicja Ewa Grzegorzewska <sup>3,†</sup>

<sup>1</sup> Department of Nephrology, Transplantology and Internal Diseases, Poznan University of Medical Sciences, Przybyszewskiego 49, 60-355 Poznań, Poland

<sup>2</sup> Department of Diagnostic and Interventional Radiology and Nuclear Medicine, University Medical Center Hamburg-Eppendorf, Martinistraße 52, 20246 Hamburg, Germany

<sup>3</sup> Department of Biochemistry and Molecular Biology, Poznan University of Medical Sciences, Święcickiego 6, 60-781 Poznań, Poland

<sup>4</sup> Department of Treatment of Obesity, Metabolic Disorders, and Clinical Dietetics, Poznań University of Medical Sciences, Szamarzewskiego 82/84, 60-569 Poznań, Poland

\* Correspondence: m.swiderska@uke.de; Tel.: +49-1522/281-5183

† The author died prior to the submission of this paper. This is one of her last works.

**Table S1:** Primer sequences and HRM conditions for the identification of genotyped nucleotide variants

| Gene           | rs no.     | Alleles <sup>1</sup> | Primers for PCR <sup>2</sup> Amplification (5'–3')  | PCR product length (bp <sup>3</sup> ) | Annealing Temp. (°C) | Melt Temp. Range (°C) |
|----------------|------------|----------------------|-----------------------------------------------------|---------------------------------------|----------------------|-----------------------|
| <i>FOXO3</i>   | rs2802292  | <u>C</u> /T          | F: AGGGTCTCTGTTGCTCACAAG<br>R: AGCAGGACCCCTTCATCTG  | 70                                    | 58                   | 78 – 92               |
| <i>FOXO3</i>   | rs4946936  | C/ <u>T</u>          | F: GAGTGCTTCCAGCATTAGGG<br>R: GGAGGGTTGCCTTTCTCAC   | 135                                   | 61                   | 80 – 95               |
| <i>IGFBP3</i>  | rs3110697  | <u>A</u> /G          | F: ACGAGCAATGGCAATGGA<br>R: ACAGAATTGGCCTTTGGAGA    | 120                                   | 58                   | 75 – 90               |
| <i>FABP1</i>   | rs2241883  | <u>C</u> /T          | F: GTGATTATGTCGCCGTTGAG<br>R: TGCAGACAGTGGTTCAGTTG  | 94                                    | 58                   | 76 - 91               |
| <i>FABP1</i>   | rs2919872  | C/ <u>T</u>          | F: GTGCACGTCCCAGTTCCT<br>R: AAGGTTGACGCCAAAGTCC     | 98                                    | 58                   | 80 - 95               |
| <i>PCSK9</i>   | rs562556   | A/ <u>G</u>          | F: TCAGCACACTCGGGGCCTAC<br>R: GCTCAGCAGCTCCTCATCTGG | 142                                   | 58                   | 80 – 95               |
| <i>PCSK9</i>   | rs11206510 | <u>C</u> /T          | F: GCTTCCCCAAGGATATAGGG<br>R: GGAAGAGGAGCCAAAGACG   | 68                                    | 58                   | 75 – 90               |
| <i>ANGPTL6</i> | rs8112063  | <u>C</u> /T          | F: GATCCAACCCATCTCAGCAG<br>R: AGTGGGGAGTAGCGGAGAC   | 96                                    | 58                   | 80 – 95               |
| <i>DOCK6</i>   | rs737337   | <u>C</u> /T          | F: GGGTGCACAGAGGACACG<br>R: TGGGTGGACGGTCACAAG      | 62                                    | 58                   | 80 – 95               |
| <i>DOCK6</i>   | rs17699089 | A/ <u>G</u>          | F: TCATTCACGTTGTCGTCTCT<br>R: GTGTTGCCACGTGTGTG     | 73                                    | 58                   | 75 - 90               |

<sup>1</sup> underline denotes the minor allele

<sup>2</sup> PCR, polymerase chain reaction

<sup>3</sup> bp, base pairs

**Table S2:** The expected power for 1.00 – 1.75 ORs in association analyses of the HD patients who died and those who survived

| Gene symbol   | rs number  | Allele<br>frequency <sup>a</sup> | Genotype<br>relative risk | The expected power |          |           |
|---------------|------------|----------------------------------|---------------------------|--------------------|----------|-----------|
|               |            |                                  |                           | Genetic model      |          |           |
|               |            |                                  |                           | Additive           | Dominant | Recessive |
| <i>FOXO3</i>  | rs2802292  | 0.433                            | 1.00                      | 0.050              | 0.050    | 0.050     |
|               |            |                                  | 1.25                      | 1.000              | 0.896    | 0.782     |
|               |            |                                  | 1.50                      | 1.000              | 1.000    | 1.000     |
|               |            |                                  | 1.75                      | 1.000              | 1.000    | 1.000     |
| <i>FOXO3</i>  | rs4946936  | 0.345                            | 1.00                      | 0.050              | 0.050    | 0.050     |
|               |            |                                  | 1.25                      | 1.000              | 0.958    | 0.570     |
|               |            |                                  | 1.50                      | 1.000              | 1.000    | 0.988     |
|               |            |                                  | 1.75                      | 1.000              | 1.000    | 1.000     |
| <i>IGFBP3</i> | rs3110697  | 0.429                            | 1.00                      | 0.050              | 0.050    | 0.050     |
|               |            |                                  | 1.25                      | 1.000              | 0.900    | 0.775     |
|               |            |                                  | 1.50                      | 1.000              | 1.000    | 1.000     |
|               |            |                                  | 1.75                      | 1.000              | 1.000    | 1.000     |
| <i>IGFBP3</i> | rs2854744  | 0.457                            | 1.00                      | 0.050              | 0.050    | 0.050     |
|               |            |                                  | 1.25                      | 1.000              | 0.867    | 0.824     |
|               |            |                                  | 1.50                      | 1.000              | 1.000    | 1.000     |
|               |            |                                  | 1.75                      | 1.000              | 1.000    | 1.000     |
| <i>FABP1</i>  | rs2241883  | 0.348                            | 1.00                      | 0.050              | 0.050    | 0.050     |
|               |            |                                  | 1.25                      | 1.000              | 0.957    | 0.578     |
|               |            |                                  | 1.50                      | 1.000              | 1.000    | 0.989     |
|               |            |                                  | 1.75                      | 1.000              | 1.000    | 1.000     |
| <i>FABP1</i>  | rs2919872  | 0.466                            | 1.00                      | 0.050              | 0.050    | 0.050     |
|               |            |                                  | 1.25                      | 1.000              | 0.855    | 0.837     |
|               |            |                                  | 1.50                      | 1.000              | 1.000    | 1.000     |
|               |            |                                  | 1.75                      | 1.000              | 1.000    | 1.000     |
| <i>PCSK9</i>  | rs562556   | 0.179                            | 1.00                      | 0.050              | 0.050    | 0.050     |
|               |            |                                  | 1.25                      | 0.999              | 0.982    | 0.149     |
|               |            |                                  | 1.50                      | 1.000              | 1.000    | 0.448     |
|               |            |                                  | 1.75                      | 1.000              | 1.000    | 0.900     |
| <i>PCSK9</i>  | rs11206510 | 0.172                            | 1.00                      | 0.050              | 0.050    | 0.050     |
|               |            |                                  | 1.25                      | 0.998              | 0.981    | 0.139     |
|               |            |                                  | 1.50                      | 1.000              | 1.000    | 0.410     |
|               |            |                                  | 1.75                      | 1.000              | 1.000    | 0.833     |

|                |            |       |      |       |       |       |
|----------------|------------|-------|------|-------|-------|-------|
| <i>ANGPTL6</i> | rs8112063  | 0.434 | 1.00 | 0.050 | 0.050 | 0.050 |
|                |            |       | 1.25 | 1.000 | 0.895 | 0.784 |
|                |            |       | 1.50 | 1.000 | 1.000 | 1.000 |
|                |            |       | 1.75 | 1.000 | 1.000 | 1.000 |
| <i>DOCK6</i>   | rs737337   | 0.073 | 1.00 | 0.050 | 0.050 | 0.050 |
|                |            |       | 1.25 | 0.950 | 0.914 | 0.057 |
|                |            |       | 1.50 | 1.000 | 1.000 | 0.080 |
|                |            |       | 1.75 | 1.000 | 1.000 | 0.118 |
| <i>DOCK6</i>   | rs17699089 | 0.089 | 1.00 | 0.050 | 0.050 | 0.050 |
|                |            |       | 1.25 | 0.974 | 0.943 | 0.063 |
|                |            |       | 1.50 | 1.000 | 1.000 | 0.104 |
|                |            |       | 1.75 | 1.000 | 1.000 | 0.174 |

<sup>a</sup> 1000 Genomes project, EUR samples.



|              |             |             |             |           |       |             |            |          |       |       |           |
|--------------|-------------|-------------|-------------|-----------|-------|-------------|------------|----------|-------|-------|-----------|
| <i>DOCK6</i> | rs737337    | 625 (80.1%) | 141 (18.1%) | 14 (1.8%) | 0.072 | 300 (83.3%) | 57 (15.8%) | 3 (0.8%) | 0.872 | 0.198 | Dominant  |
|              |             |             |             |           |       |             |            |          |       | 0.213 | Recessive |
|              |             |             |             |           |       |             |            |          |       | 0.195 | Additive  |
|              |             |             |             |           |       |             |            |          |       | 0.088 | Dominant  |
| <i>DOCK6</i> | rs176990893 | 553 (70.6%) | 199 (25.4%) | 31 (4.0%) | 0.017 | 271 (75.5%) | 80 (22.3%) | 8 (2.2%) | 0.471 | 0.134 | Recessive |
|              |             |             |             |           |       |             |            |          |       | 0.106 | Additive  |
|              |             |             |             |           |       |             |            |          |       |       |           |

<sup>1</sup> Hardy-Weinberg equilibrium

<sup>2</sup> Pearson's chi-squared test comparing frequency distributions of the analyzed variants in HD patients and healthy controls

**Table S4:** *DOCK6* rs737337 nucleotide variants and clinical and laboratory data of HD patients (n = 780)

| Parameter                                   | CC<br>n = 14        | CT<br>n = 141       | TT<br>n = 625       | P value <sup>1</sup> |           |
|---------------------------------------------|---------------------|---------------------|---------------------|----------------------|-----------|
| Clinical data                               |                     |                     |                     |                      |           |
| Male gender, n (%)                          | 8 (57%)             | 78 (55%)            | 354 (57%)           | 0.795                | Dominant  |
|                                             |                     |                     |                     | 0.956                | Recessive |
|                                             |                     |                     |                     | 0.970                | Additive  |
| Age at the beginning of RRT, years          | 61.8 (33.6 – 75.7)  | 62.2 (11.8 – 89.4)  | 61.2 (8.7 – 91.7)   | 0.649                | Dominant  |
|                                             |                     |                     |                     | 0.906                | Recessive |
|                                             |                     |                     |                     | 0.784                | Additive  |
| RRT vintage, years                          | 4.53 (1.39 – 23.64) | 5.86 (0.09 – 28.67) | 5.83 (0.04 – 32.88) | 0.408                | Dominant  |
|                                             |                     |                     |                     | 0.165                | Recessive |
|                                             |                     |                     |                     | 0.420                | Additive  |
| Renal transplantation, n (%)                | 3 (21%)             | 23 (16%)            | 123 (20%)           | 0.410                | Dominant  |
|                                             |                     |                     |                     | 0.738 <sup>2</sup>   | Recessive |
|                                             |                     |                     |                     | 0.745 <sup>2</sup>   | Additive  |
| Diabetic nephropathy, n (%)                 | 5 (36%)             | 57 (40%)            | 177 (28%)           | 0.005                | Dominant  |
|                                             |                     |                     |                     | 0.771 <sup>2</sup>   | Recessive |
|                                             |                     |                     |                     | 0.555 <sup>2</sup>   | Additive  |
| Hypertensive nephropathy, n (%)             | 2 (14%)             | 21 (15%)            | 143 (23%)           | 0.029                | Dominant  |
|                                             |                     |                     |                     | 0.745 <sup>2</sup>   | Recessive |
|                                             |                     |                     |                     | 0.747 <sup>2</sup>   | Additive  |
| Chronic glomerulonephritis, n (%)           | 1 (7%)              | 15 (11%)            | 85 (14%)            | 0.276                | Dominant  |
|                                             |                     |                     |                     | 1.000 <sup>2</sup>   | Recessive |
|                                             |                     |                     |                     | 0.706 <sup>2</sup>   | Additive  |
| Chronic tubulointerstitial nephritis, n (%) | 1 (7%)              | 11 (8%)             | 51 (8%)             | 0.864                | Dominant  |
|                                             |                     |                     |                     | 1.000 <sup>2</sup>   | Recessive |
|                                             |                     |                     |                     | 1.000 <sup>2</sup>   | Additive  |
| Coronary artery disease, n (%)              | 7 (50%)             | 56 (40%)            | 231 (37%)           | 0.319                | Dominant  |
|                                             |                     |                     |                     | 0.343                | Recessive |
|                                             |                     |                     |                     | 0.318                | Additive  |
| Myocardial infarction, n (%)                | 3 (21%)             | 30 (21%)            | 133 (21%)           | 0.998                | Dominant  |
|                                             |                     |                     |                     | 1.000 <sup>2</sup>   | Recessive |
|                                             |                     |                     |                     | 1.000 <sup>2</sup>   | Additive  |
| Cerebral stroke, n (%)                      | 4 (28%)             | 38 (27%)            | 163 (26%)           | 0.944                | Dominant  |
|                                             |                     |                     |                     | 0.538 <sup>2</sup>   | Recessive |
|                                             |                     |                     |                     | 0.537 <sup>2</sup>   | Additive  |
| Dyslipidemia by K/DOQI, n (%)               | 8 (57%)             | 76 (54%)            | 325 (52%)           | 0.624                | Dominant  |
|                                             |                     |                     |                     | 0.722                | Recessive |
|                                             |                     |                     |                     | 0.703                | Additive  |
| Hypolipemic therapy, n (%)                  | 2 (14%)             | 60 (43%)            | 257 (41%)           | 0.534                | Dominant  |
|                                             |                     |                     |                     | 0.236                | Recessive |
|                                             |                     |                     |                     | 0.229                | Additive  |
| Smoker, n (%)                               | 0 (0%)              | 23 (16%)            | 109 (17%)           | 0.088                | Dominant  |
|                                             |                     |                     |                     | 0.475 <sup>2</sup>   | Recessive |
|                                             |                     |                     |                     | 0.143 <sup>2</sup>   | Additive  |
| Weight, kg                                  | 70.4 (52.5 - 109)   | 71.5 (31.0 – 115.1) | 73.2 (36.0 – 196.0) | 0.108                | Dominant  |
|                                             |                     |                     |                     | 0.944                | Recessive |
|                                             |                     |                     |                     | 0.114                | Additive  |
| Height, m                                   | 1.67 (1.50 – 1.80)  | 1.66 (1.28 – 1.91)  | 1.68 (1.37 – 1.93)  | 0.177                | Dominant  |
|                                             |                     |                     |                     | 0.991                | Recessive |
|                                             |                     |                     |                     | 0.157                | Additive  |
| BMI, kg/m <sup>2</sup>                      | 25.7 (20.3 – 35.6)  | 25.1 (15.2 – 39.5)  | 25.8 (14.3 – 59.2)  | 0.124                | Dominant  |
|                                             |                     |                     |                     | 0.776                | Recessive |
|                                             |                     |                     |                     | 0.216                | Additive  |

| Laboratory data                                             |                       |                       |                      |       |           |
|-------------------------------------------------------------|-----------------------|-----------------------|----------------------|-------|-----------|
| CRP, mg/L                                                   | 5.11 (1.30 – 52.5)    | 5.30 (0.29 – 96.60)   | 5.70 (0.10 – 195.00) | 0.682 | Dominant  |
|                                                             |                       |                       |                      | 0.851 | Recessive |
|                                                             |                       |                       |                      | 0.837 | Additive  |
| Total cholesterol, mg/dL                                    | 164.0 (109.3 – 280.0) | 177.0 (72.0 – 363.0)  | 171.0 (76.3 – 626.0) | 0.320 | Dominant  |
|                                                             |                       |                       |                      | 0.639 | Recessive |
|                                                             |                       |                       |                      | 0.170 | Additive  |
| HDL-cholesterol, mg/dL                                      | 47.5 (27.0 – 68.0)    | 39.0 (17.3 – 81.0)    | 40.0 (6.0 – 118.0)   | 0.902 | Dominant  |
|                                                             |                       |                       |                      | 0.135 | Recessive |
|                                                             |                       |                       |                      | 0.575 | Additive  |
| LDL-cholesterol, mg/dL                                      | 102.4 (38.5 – 211.0)  | 96.0 (31.0 – 328.0)   | 95.6 (25.0 – 512.0)  | 0.730 | Dominant  |
|                                                             |                       |                       |                      | 0.770 | Recessive |
|                                                             |                       |                       |                      | 0.340 | Additive  |
| TG, mg/dL                                                   | 141.0 (53.0 – 330.0)  | 149.0 (35.0 – 689.0)  | 149.0 (26.0 – 856.0) | 0.448 | Dominant  |
|                                                             |                       |                       |                      | 0.956 | Recessive |
|                                                             |                       |                       |                      | 0.240 | Additive  |
| Ca, mg/dL                                                   | 8.51 (7.96 – 9.29)    | 8.80 (6.01 – 10.93)   | 8.84 (6.65 – 12.76)  | 0.199 | Dominant  |
|                                                             |                       |                       |                      | 0.104 | Recessive |
|                                                             |                       |                       |                      | 0.187 | Additive  |
| Phosphate, mg/dL                                            | 4.91 (4.27 – 8.28)    | 5.04 (1.75 – 11.14)   | 5.15 (2.03 – 11.27)  | 0.291 | Dominant  |
|                                                             |                       |                       |                      | 0.952 | Recessive |
|                                                             |                       |                       |                      | 0.436 | Additive  |
| Intact PTH, pg/mL                                           | 325.3 (88.0 – 796.2)  | 340.3 (12.9 – 3757.0) | 402.0 (5.5 – 3118.2) | 0.051 | Dominant  |
|                                                             |                       |                       |                      | 0.241 | Recessive |
|                                                             |                       |                       |                      | 0.105 | Additive  |
| Calcium phosphate product, mg <sup>2</sup> /dL <sup>2</sup> | 42.5 (34.8 – 69.8)    | 44.4 (16.7 – 87.4)    | 45.1 (18.4 – 108.7)  | 0.220 | Dominant  |
|                                                             |                       |                       |                      | 0.764 | Recessive |
|                                                             |                       |                       |                      | 0.273 | Additive  |

<sup>1</sup> Chi-squared test for dichotomous variables or Mann-Whitney U test for quantitative variables

<sup>2</sup> Fisher’s exact test

Abbreviations: BMI: body mass index; CRP: C-reactive protein; HDL: high-density lipoprotein; K/DOQI: Kidney Disease Outcomes Quality Initiative; LDL: low-density lipoprotein, PTH: parathormone, RRT: renal replacement therapy; TG: triglycerides.

**Table S5:** *ANGPTL6* rs8112063 nucleotide variants and clinical and laboratory data of HD patients (n = 780)

| Parameter                                   | CC<br>N = 172       | CT<br>N = 370       | TT<br>N = 238       | P value <sup>1</sup> |           |
|---------------------------------------------|---------------------|---------------------|---------------------|----------------------|-----------|
| Clinical data                               |                     |                     |                     |                      |           |
| Male gender, n (%)                          | 99 (58%)            | 211 (57%)           | 130 (55%)           | 0.504                | Dominant  |
|                                             |                     |                     |                     | 0.730                | Recessive |
|                                             |                     |                     |                     | 0.555                | Additive  |
| Age at the beginning of RRT, years          | 62.1 (8.7 – 89.4)   | 61.0 (11.0 – 89.0)  | 61.2 (16.4 – 91.7)  | 0.433                | Dominant  |
|                                             |                     |                     |                     | 0.824                | Recessive |
|                                             |                     |                     |                     | 0.784                | Additive  |
| RRT vintage, years                          | 5.49 (0.04 – 29.88) | 5.85 (0.09 – 31.09) | 5.96 (0.15 – 32.88) | 0.576                | Dominant  |
|                                             |                     |                     |                     | 0.339                | Recessive |
|                                             |                     |                     |                     | 0.259                | Additive  |
| Renal transplantation, n (%)                | 36 (21%)            | 72 (19%)            | 41 (17%)            | 0.377                | Dominant  |
|                                             |                     |                     |                     | 0.490                | Recessive |
|                                             |                     |                     |                     | 0.343                | Additive  |
| Diabetic nephropathy, n (%)                 | 65 (38%)            | 110 (30%)           | 65 (27%)            | 0.166                | Dominant  |
|                                             |                     |                     |                     | 0.024                | Recessive |
|                                             |                     |                     |                     | 0.024                | Additive  |
| Hypertensive nephropathy, n (%)             | 30 (17%)            | 78 (21%)            | 59 (25%)            | 0.127                | Dominant  |
|                                             |                     |                     |                     | 0.151                | Recessive |
|                                             |                     |                     |                     | 0.075                | Additive  |
| Chronic glomerulonephritis, n (%)           | 18 (10%)            | 48 (13%)            | 35 (15%)            | 0.333                | Dominant  |
|                                             |                     |                     |                     | 0.271                | Recessive |
|                                             |                     |                     |                     | 0.207                | Additive  |
| Chronic tubulointerstitial nephritis, n (%) | 6 (3%)              | 37 (10%)            | 20 (8%)             | 0.825                | Dominant  |
|                                             |                     |                     |                     | 0.012                | Recessive |
|                                             |                     |                     |                     | 0.044                | Additive  |
| Coronary artery disease, n (%)              | 63 (37%)            | 142 (38%)           | 88 (37%)            | 0.784                | Dominant  |
|                                             |                     |                     |                     | 0.744                | Recessive |
|                                             |                     |                     |                     | 0.943                | Additive  |
| Myocardial infarction, n (%)                | 32 (19%)            | 83 (22%)            | 50 (21%)            | 0.947                | Dominant  |
|                                             |                     |                     |                     | 0.354                | Recessive |
|                                             |                     |                     |                     | 0.548                | Additive  |
| Cerebral stroke, n (%)                      | 42 (24%)            | 106 (29%)           | 56 (24%)            | 0.269                | Dominant  |
|                                             |                     |                     |                     | 0.558                | Recessive |
|                                             |                     |                     |                     | 0.835                | Additive  |
| Dyslipidemia by K/DOQI, n (%)               | 82 (48%)            | 189 (51%)           | 137 (58%)           | 0.052                | Dominant  |
|                                             |                     |                     |                     | 0.168                | Recessive |
|                                             |                     |                     |                     | 0.048                | Additive  |
| Hypolipemic therapy, n (%)                  | 77 (45%)            | 153 (41%)           | 95 (40%)            | 0.511                | Dominant  |
|                                             |                     |                     |                     | 0.350                | Recessive |
|                                             |                     |                     |                     | 0.326                | Additive  |
| Smoker, n (%)                               | 30 (17)             | 62 (17%)            | 40 (17%)            | 0.837                | Dominant  |
|                                             |                     |                     |                     | 0.954                | Recessive |
|                                             |                     |                     |                     | 0.866                | Additive  |
| Weight, kg                                  | 70.5 (35.5 – 118.0) | 74.4 (31.0 – 196.0) | 73.1 (39.6 – 140.0) | 0.499                | Dominant  |
|                                             |                     |                     |                     | 0.048                | Recessive |
|                                             |                     |                     |                     | 0.097                | Additive  |
| Height, m                                   | 1.67 (1.40 – 1.93)  | 1.68 (1.28 – 1.91)  | 1.68 (1.42 – 1.89)  | 0.284                | Dominant  |
|                                             |                     |                     |                     | 0.270                | Recessive |
|                                             |                     |                     |                     | 0.181                | Additive  |
| BMI, kg/m <sup>2</sup>                      | 25.2 (14.7 – 37.4)  | 26.0 (14.3 – 59.2)  | 25.6 (16.5 – 44.2)  | 0.891                | Dominant  |
|                                             |                     |                     |                     | 0.121                | Recessive |
|                                             |                     |                     |                     | 0.299                | Additive  |



| Laboratory data                                             |                      |                       |                      |       |           |
|-------------------------------------------------------------|----------------------|-----------------------|----------------------|-------|-----------|
| CRP, mg/L                                                   | 5.30 (0.20 – 83.30)  | 5.95 (0.10 – 195.00)  | 5.05 (0.30 – 120.60) | 0.347 | Dominant  |
|                                                             |                      |                       |                      | 0.693 | Recessive |
|                                                             |                      |                       |                      | 0.615 | Additive  |
| Total cholesterol, mg/dL                                    | 168.5 (92.0 – 336.0) | 170.0 (72.0 – 626.0)  | 176.0 (76.3 – 363.0) | 0.199 | Dominant  |
|                                                             |                      |                       |                      | 0.131 | Recessive |
|                                                             |                      |                       |                      | 0.278 | Additive  |
| HDL-cholesterol, mg/dL                                      | 40.0 (7.0 – 93.0)    | 41.0 (14.0 – 103.0)   | 37.5 (6.0 – 118.0)   | 0.014 | Dominant  |
|                                                             |                      |                       |                      | 0.412 | Recessive |
|                                                             |                      |                       |                      | 0.089 | Additive  |
| LDL-cholesterol, mg/dL                                      | 91.0 (26.8 – 232.0)  | 94.2 (27.0 – 512.0)   | 100.5 (25.0 – 350.0) | 0.026 | Dominant  |
|                                                             |                      |                       |                      | 0.019 | Recessive |
|                                                             |                      |                       |                      | 0.060 | Additive  |
| TG, mg/dL                                                   | 147.0 (35.0 – 652.0) | 144.5 (29.8 – 856.0)  | 155.0 (26.0 – 544.0) | 0.391 | Dominant  |
|                                                             |                      |                       |                      | 0.553 | Recessive |
|                                                             |                      |                       |                      | 0.987 | Additive  |
| Ca, mg/dL                                                   | 8.82 (6.70 – 12.25)  | 8.83 (6.01 – 11.70)   | 8.83 (6.65 – 12.76)  | 0.683 | Dominant  |
|                                                             |                      |                       |                      | 0.741 | Recessive |
|                                                             |                      |                       |                      | 0.707 | Additive  |
| Phosphate, mg/dL                                            | 5.30 (2.53 – 11.27)  | 4.98 (2.03 – 11.14)   | 5.21 (1.75 – 10.30)  | 0.336 | Dominant  |
|                                                             |                      |                       |                      | 0.400 | Recessive |
|                                                             |                      |                       |                      | 0.883 | Additive  |
| Intact PTH, pg/mL                                           | 369.9 (5.5 – 2991.5) | 391.2 (12.9 – 3757.0) | 389.8 (8.9 – 2186.0) | 0.850 | Dominant  |
|                                                             |                      |                       |                      | 0.492 | Recessive |
|                                                             |                      |                       |                      | 0.629 | Additive  |
| Calcium phosphate product, mg <sup>2</sup> /dL <sup>2</sup> | 45.5 (19.3 – 105.3)  | 43.8 (16.7 – 90.7)    | 45.6 (17.6 – 108.7)  | 0.367 | Dominant  |
|                                                             |                      |                       |                      | 0.456 | Recessive |
|                                                             |                      |                       |                      | 0.881 | Additive  |

<sup>1</sup> Chi-squared test for dichotomous variables or Mann-Whitney U test for quantitative variables

**Table S6:** *FOXO3* rs4946936 nucleotide variants and clinical and laboratory data of HD patients (n = 778)

| Parameter                                   | TT<br>N = 74        | CT<br>N = 324       | CC<br>N = 380       | P value <sup>1</sup> |           |
|---------------------------------------------|---------------------|---------------------|---------------------|----------------------|-----------|
| Clinical data                               |                     |                     |                     |                      |           |
|                                             |                     |                     |                     | 0.196                | Dominant  |
| Male gender, n (%)                          | 45 (61%)            | 188 (58%)           | 205 (54%)           | 0.881                | Recessive |
|                                             |                     |                     |                     | 0.830                | Additive  |
|                                             |                     |                     |                     | 0.316                | Dominant  |
| Age at the beginning of RRT, years          | 59.7 (18.6 – 91.7)  | 61.1 (8.7 – 90.8)   | 61.7 (11.1 – 89.4)  | 0.332                | Recessive |
|                                             |                     |                     |                     | 0.181                | Additive  |
|                                             |                     |                     |                     | 0.306                | Dominant  |
| RRT vintage, years                          | 7.11 (0.40 – 25.56) | 5.42 (0.09 – 31.09) | 6.07 (0.04 – 32.88) | 0.054                | Recessive |
|                                             |                     |                     |                     | 0.777                | Additive  |
|                                             |                     |                     |                     | 0.060                | Dominant  |
| Renal transplantation, n (%)                | 13 (18%)            | 73 (23%)            | 62 (16%)            | 0.737                | Recessive |
|                                             |                     |                     |                     | 0.790                | Additive  |
|                                             |                     |                     |                     | 0.846                | Dominant  |
| Diabetic nephropathy, n (%)                 | 23 (31%)            | 100 (31%)           | 115 (30%)           | 0.923                | Recessive |
|                                             |                     |                     |                     | 0.889                | Additive  |
|                                             |                     |                     |                     | 0.780                | Dominant  |
| Hypertensive nephropathy, n (%)             | 14 (19%)            | 72 (22%)            | 79 (21%)            | 0.613                | Recessive |
|                                             |                     |                     |                     | 0.713                | Additive  |
|                                             |                     |                     |                     | 0.374                | Dominant  |
| Chronic glomerulonephritis, n (%)           | 10 (14%)            | 38 (12%)            | 54 (14%)            | 0.914                | Recessive |
|                                             |                     |                     |                     | 0.875                | Additive  |
|                                             |                     |                     |                     | 0.385                | Dominant  |
| Chronic tubulointerstitial nephritis, n (%) | 5 (7%)              | 30 (9%)             | 27 (7%)             | 0.686                | Recessive |
|                                             |                     |                     |                     | 0.915                | Additive  |
|                                             |                     |                     |                     | 0.344                | Dominant  |
| Coronary artery disease, n (%)              | 29 (39%)            | 114 (35%)           | 150 (39%)           | 0.608                | Recessive |
|                                             |                     |                     |                     | 0.864                | Additive  |
|                                             |                     |                     |                     | 0.440                | Dominant  |
| Myocardial infarction, n (%)                | 18 (24%)            | 61 (19%)            | 84 (22%)            | 0.454                | Recessive |
|                                             |                     |                     |                     | 0.676                | Additive  |
|                                             |                     |                     |                     | 0.953                | Dominant  |
| Cerebral stroke, n (%)                      | 14 (19%)            | 90 (28%)            | 100 (26%)           | 0.133                | Recessive |
|                                             |                     |                     |                     | 0.179                | Additive  |
|                                             |                     |                     |                     | 0.009                | Dominant  |
| Dyslipidemia by K/DOQI, n (%)               | 36 (49%)            | 154 (48%)           | 217 (57%)           | 0.507                | Recessive |
|                                             |                     |                     |                     | 0.180                | Additive  |
|                                             |                     |                     |                     | 0.742                | Dominant  |
| Hypolipemic therapy, n (%)                  | 29 (39%)            | 135 (42%)           | 161 (42%)           | 0.636                | Recessive |
|                                             |                     |                     |                     | 0.612                | Additive  |
|                                             |                     |                     |                     | 0.421                | Dominant  |
| Smoker, n (%)                               | 10 (14%)            | 49 (15%)            | 72 (19%)            | 0.125                | Recessive |
|                                             |                     |                     |                     | 0.266                | Additive  |
|                                             |                     |                     |                     | 0.629                | Dominant  |
| Weight, kg                                  | 70.4 (39.3 – 110.0) | 73.2 (35.5 - 196)   | 74.0 (31.0 – 122.0) | 0.174                | Recessive |
|                                             |                     |                     |                     | 0.458                | Additive  |
|                                             |                     |                     |                     | 0.779                | Dominant  |
| Height, m                                   | 1.68 (1.28 – 1.86)  | 1.68 (1.40 – 1.90)  | 1.68 (1.36 – 1.93)  | 0.794                | Recessive |
|                                             |                     |                     |                     | 0.885                | Additive  |
|                                             |                     |                     |                     | 0.550                | Dominant  |
| BMI, kg/m²                                  | 24.3 (17.4 – 37.9)  | 26.0 (14.7 – 59.2)  | 25.7 (14.3 – 39.8)  | 0.104                | Recessive |
|                                             |                     |                     |                     | 0.276                | Additive  |

| Laboratory data                                             |                      |                      |                      |       |           |
|-------------------------------------------------------------|----------------------|----------------------|----------------------|-------|-----------|
| CRP, mg/L                                                   | 5.45 (0.60 – 142.00) | 5.70 (0.10 – 181.00) | 5.30 (0.20 – 119.60) | 0.383 | Dominant  |
|                                                             |                      |                      |                      | 0.739 | Recessive |
|                                                             |                      |                      |                      | 0.352 | Additive  |
| Total cholesterol, mg/dL                                    | 168.5 (84.9 – 336.0) | 167.5 (76.3 – 626.0) | 176.0 (72.0 – 363.0) | 0.029 | Dominant  |
|                                                             |                      |                      |                      | 0.488 | Recessive |
|                                                             |                      |                      |                      | 0.146 | Additive  |
| HDL-cholesterol, mg/dL                                      | 40.9 (17.3 – 118.0)  | 39.0 (7.0 – 103.0)   | 40.0 (6.0 – 90.2)    | 0.791 | Dominant  |
|                                                             |                      |                      |                      | 0.222 | Recessive |
|                                                             |                      |                      |                      | 0.477 | Additive  |
| LDL-cholesterol, mg/dL                                      | 96.0 (36.1 – 215.0)  | 92.0 (25.0 – 512.0)  | 99.7 (27.0 – 369.0)  | 0.036 | Dominant  |
|                                                             |                      |                      |                      | 0.609 | Recessive |
|                                                             |                      |                      |                      | 0.173 | Additive  |
| TG, mg/dL                                                   | 147.5 (29.8 – 475.0) | 150.5 (39.0 – 691.0) | 146.9 (26.0 – 856.0) | 0.973 | Dominant  |
|                                                             |                      |                      |                      | 0.404 | Recessive |
|                                                             |                      |                      |                      | 0.956 | Additive  |
| Ca, mg/dL                                                   | 8.71 (6.65 – 12.25)  | 8.81 (6.01 – 12.76)  | 8.87 (6.74 – 11.70)  | 0.452 | Dominant  |
|                                                             |                      |                      |                      | 0.634 | Recessive |
|                                                             |                      |                      |                      | 0.743 | Additive  |
| Phosphate, mg/dL                                            | 5.03 (2.78 – 10.30)  | 4.98 (2.03 – 10.96)  | 5.30 (1.75 – 11.27)  | 0.063 | Dominant  |
|                                                             |                      |                      |                      | 0.691 | Recessive |
|                                                             |                      |                      |                      | 0.193 | Additive  |
| Intact PTH, pg/mL                                           | 418.9 (7.3 – 3118.3) | 390.7 (9.7 – 3757.0) | 383.6 (5.5 – 3000.0) | 0.619 | Dominant  |
|                                                             |                      |                      |                      | 0.697 | Recessive |
|                                                             |                      |                      |                      | 0.636 | Additive  |
| Calcium phosphate product, mg <sup>2</sup> /dL <sup>2</sup> | 43.5 (22.6 – 108.7)  | 43.8 (18.4 – 100.5)  | 45.7 (16.7 – 105.3)  | 0.059 | Dominant  |
|                                                             |                      |                      |                      | 0.774 | Recessive |
|                                                             |                      |                      |                      | 0.248 | Additive  |

<sup>1</sup> Chi-squared test for dichotomous variables or Mann-Whitney U test for quantitative variables

**Table S7:** Associations between the selected energy homeostasis nucleotide variants and all-cause mortality of HD patients evaluated by Kaplan-Meier analysis

| Tested variant           | N   | Major homozygotes vs. heterozygotes vs. minor homozygotes <sup>1</sup> | Dominant mode of inheritance <sup>2</sup> | Recessive mode of inheritance <sup>2</sup> | Additive mode of inheritance <sup>2</sup> |
|--------------------------|-----|------------------------------------------------------------------------|-------------------------------------------|--------------------------------------------|-------------------------------------------|
| <i>FOXO3</i> rs2802292   | 784 | TT vs. GT vs. GG<br>p = 0.9                                            | GG + GT vs. TT<br>p = 0.9                 | GG vs. GT + TT<br>p = 0.7                  | GG vs. TT<br>p = 0.9                      |
| <i>FOXO3</i> rs4946936   | 778 | CC vs. CT vs. TT<br>p = 0.3                                            | TT + CT vs. CC<br>p = 0.7                 | TT vs. CT + CC<br>p = 0.1                  | TT vs. CC<br>P = 0.1                      |
| <i>IGFBP3</i> rs3110697  | 780 | GG vs. AG vs. AA<br>p = 0.4                                            | AA + AG vs. GG<br>p = 0.2                 | AA vs. AG + GG<br>p = 0.7                  | AA vs. GG<br>p = 0.3                      |
| <i>IGFBP3</i> rs2854744  | 782 | GG vs. GT vs. TT<br>p = 0.7                                            | TT + GT vs. GG<br>p = 0.9                 | TT vs. GT + GG<br>p = 0.4                  | TT vs. GG<br>p = 0.6                      |
| <i>FABP1</i> rs2241883   | 782 | TT vs. CT vs. CC<br>p = 0.6                                            | CC + CT vs. TT<br>p = 0.5                 | CC vs. CT + TT<br>p = 0.6                  | CC vs. TT<br>p = 0.9                      |
| <i>FABP1</i> rs2919872   | 775 | CC vs. CT vs. TT<br>p = 0.5                                            | TT + CT vs. CC<br>p = 0.7                 | TT vs. CT + CC<br>p = 0.3                  | TT vs. CC<br>p = 0.6                      |
| <i>PCSK9</i> rs562556    | 780 | AA vs. AG vs. GG<br>p = 0.4                                            | GG + AG vs. AA<br>p = 1.0                 | GG vs. AG + AA<br>p = 0.2                  | GG vs. AA<br>p = 0.2                      |
| <i>PCSK9</i> rs11206510  | 781 | TT vs. CT vs. CC<br>p = 0.1                                            | CC + CT vs. TT<br>p = 0.9                 | CC vs. CT + TT<br>p = 0.4                  | CC vs. TT<br>p = 0.4                      |
| <i>ANGPTL6</i> rs8112063 | 780 | TT vs. CT vs. CC<br>p = 0.1                                            | CC + CT vs. TT<br>p = 0.05                | CC vs. CT + TT<br>p = 0.6                  | CC vs. TT<br>p = 0.2                      |
| <i>DOCK6</i> rs737337    | 780 | TT vs. CT vs. CC<br>p = 0.03                                           | CC + CT vs. TT<br>p = 0.07                | CC vs. CT + TT<br>p = 0.02                 | CC vs. TT<br>p = 0.02                     |
| <i>DOCK6</i> rs17699089  | 783 | AA vs. AG vs. GG<br>p = 0.2                                            | GG + AG vs. AA<br>p = 0.06                | GG vs. AG + AA<br>p = 0.6                  | GG vs. AA<br>p = 0.5                      |

<sup>1</sup> Multiple-sample test p

<sup>2</sup> Log-rank test p

**Table S8** Associations between the selected energy homeostasis nucleotide variants and cardiovascular mortality of HD patients evaluated by Kaplan-Meier analysis

| Tested variant           | N   | Major homozygotes vs. heterozygotes vs. minor homozygotes <sup>1</sup> | Dominant mode of inheritance <sup>2</sup> | Recessive mode of inheritance <sup>2</sup> | Additive mode of inheritance <sup>2</sup> |
|--------------------------|-----|------------------------------------------------------------------------|-------------------------------------------|--------------------------------------------|-------------------------------------------|
| <i>FOXO3</i> rs2802292   | 784 | TT vs. GT vs. GG<br>p = 0.7                                            | GG + GT vs. TT<br>p = 0.4                 | GG vs. GT + TT<br>p = 0.7                  | GG vs. TT<br>p = 0.5                      |
| <i>FOXO3</i> rs4946936   | 778 | CC vs. CT vs. TT<br>p = 0.1                                            | TT + CT vs. CC<br>p = 0.9                 | TT vs. CT + CC<br>p = 0.04                 | TT vs. CC<br>p = 0.06                     |
| <i>IGFBP3</i> rs3110697  | 780 | GG vs. AG vs. AA<br>p = 0.4                                            | AA + AG vs. GG<br>p = 0.2                 | AA vs. AG + GG<br>p = 0.4                  | AA vs. GG<br>p = 0.2                      |
| <i>IGFBP3</i> rs2854744  | 782 | GG vs. GT vs. TT<br>p = 0.4                                            | TT + GT vs. GG<br>p = 0.8                 | TT vs. GT + GG<br>p = 0.3                  | TT vs. GG<br>p = 0.5                      |
| <i>FABP1</i> rs2241883   | 782 | TT vs. CT vs. CC<br>p = 0.8                                            | CC + CT vs. TT<br>p = 0.5                 | CC vs. CT + TT<br>p = 0.9                  | CC vs. TT<br>p = 0.7                      |
| <i>FABP1</i> rs2919872   | 775 | CC vs. CT vs. TT<br>p = 0.8                                            | TT + CT vs. CC<br>p = 0.6                 | TT vs. CT + CC<br>p = 0.8                  | TT vs. CC<br>p = 0.6                      |
| <i>PCSK9</i> rs562556    | 780 | AA vs. AG vs. GG<br>p = 0.6                                            | GG + AG vs. AA<br>p = 0.3                 | GG vs. AG + AA<br>p = 0.6                  | GG vs. AA<br>p = 0.6                      |
| <i>PCSK9</i> rs11206510  | 781 | TT vs. CT vs. CC<br>p = 0.9                                            | CC + CT vs. TT<br>p = 1.0                 | CC vs. CT + TT<br>p = 0.6                  | CC vs. TT<br>p = 0.6                      |
| <i>ANGPTL6</i> rs8112063 | 780 | TT vs. CT vs. CC<br>p = 0.04                                           | CC + CT vs. TT<br>p = 0.01                | CC vs. CT + TT<br>p = 0.5                  | CC vs. TT<br>p = 0.07                     |
| <i>DOCK6</i> rs737337    | 780 | TT vs. CT vs. CC<br>p = 0.2                                            | CC + CT vs. TT<br>p = 0.2                 | CC vs. CT + TT<br>p = 0.09                 | CC vs. TT<br>p = 0.09                     |
| <i>DOCK6</i> rs17699089  | 783 | AA vs. AG vs. GG<br>p = 0.4                                            | GG + AG vs. AA<br>p = 0.5                 | GG vs. AG + AA<br>p = 0.4                  | GG vs. AA<br>p = 0.4                      |

<sup>1</sup> Multiple-sample test p

<sup>2</sup> Log-rank test p

**Table S9:** Associations between the selected energy homeostasis nucleotide variants and cardiac mortality of HD patients evaluated by Kaplan-Meier analysis

| Tested variant           | N   | Major homozytes vs. heterozygotes vs. minor homozygotes <sup>1</sup> | Dominant mode of inheritance <sup>2</sup> | Recessive mode of inheritance <sup>2</sup> | Additive mode of inheritance <sup>2</sup> |
|--------------------------|-----|----------------------------------------------------------------------|-------------------------------------------|--------------------------------------------|-------------------------------------------|
| <i>FOXO3</i> rs2802292   | 784 | TT vs. GT vs. GG<br>p = 0.5                                          | GG + GT vs. TT<br>p = 0.5                 | GG vs. GT + TT<br>p = 0.3                  | GG vs. TT<br>p = 0.2                      |
| <i>FOXO3</i> rs4946936   | 778 | CC vs. CT vs. TT<br>p = 0.06                                         | TT + CT vs. CC<br>p = 0.7                 | TT vs. CT + CC<br>p = 0.04                 | TT vs. CC<br>p = 0.07                     |
| <i>IGFBP3</i> rs3110697  | 780 | GG vs. AG vs. AA<br>p = 0.3                                          | AA + AG vs. GG<br>p = 0.2                 | AA vs. AG + GG<br>p = 0.3                  | AA vs. GG<br>p = 0.2                      |
| <i>IGFBP3</i> rs2854744  | 782 | GG vs. GT vs. TT<br>p = 0.7                                          | TT + GT vs. GG<br>p = 0.8                 | TT vs. GT + GG<br>p = 0.4                  | TT vs. GG<br>p = 0.5                      |
| <i>FABP1</i> rs2241883   | 782 | TT vs. CT vs. CC<br>p = 0.7                                          | CC + CT vs. TT<br>p = 0.8                 | CC vs. CT + TT<br>p = 0.5                  | CC vs. TT<br>p = 0.7                      |
| <i>FABP1</i> rs2919872   | 775 | CC vs. CT vs. TT<br>p = 0.9                                          | TT + CT vs. CC<br>p = 0.8                 | TT vs. CT + CC<br>p = 0.6                  | TT vs. CC<br>p = 0.6                      |
| <i>PCSK9</i> rs562556    | 780 | AA vs. AG vs. GG<br>p = 0.5                                          | GG + AG vs. AA<br>p = 0.2                 | GG vs. AG + AA<br>p = 0.9                  | GG vs. AA<br>p = 0.9                      |
| <i>PCSK9</i> rs11206510  | 781 | TT vs. CT vs. CC<br>p = 0.6                                          | CC + CT vs. TT<br>p = 0.4                 | CC vs. CT + TT<br>p = 0.9                  | CC vs. TT<br>p = 0.8                      |
| <i>ANGPTL6</i> rs8112063 | 780 | TT vs. CT vs. CC<br>p = 0.01                                         | CC + CT vs. TT<br>p = 0.003               | CC vs. CT + TT<br>p = 0.2                  | CC vs. TT<br>p = 0.01                     |
| <i>DOCK6</i> rs737337    | 780 | TT vs. CT vs. CC<br>p = 0.04                                         | CC + CT vs. TT<br>p = 0.05                | CC vs. CT + TT<br>p = 0.05                 | CC vs. TT<br>p = 0.03                     |
| <i>DOCK6</i> rs17699089  | 783 | AA vs. AG vs. GG<br>p = 0.1                                          | GG + AG vs. AA<br>p = 0.07                | GG vs. AG + AA<br>p = 0.8                  | GG vs. AA<br>p = 1.0                      |

<sup>1</sup> Multiple-sample test p

<sup>2</sup> Log-rank test p

**Table S10:** Associations between the selected energy homeostasis nucleotide variants and all-cause mortality of patients initiating HD therapy evaluated by Kaplan-Meier analysis

| Tested variant           | N  | Major homozygotes vs. heterozygotes vs. minor homozygotes <sup>1</sup> | Dominant mode of inheritance <sup>2</sup>             | Recessive mode of inheritance <sup>2</sup>             | Additive mode of inheritance <sup>2</sup>         |
|--------------------------|----|------------------------------------------------------------------------|-------------------------------------------------------|--------------------------------------------------------|---------------------------------------------------|
| <i>FOXO3</i> rs2802292   | 82 | TT vs. GT vs. GG<br>p = 0.5                                            | GG + GT vs. TT<br>p = 0.4                             | GG vs. GT + TT<br>p = 0.4                              | GG vs. TT<br>p = 0.3                              |
| <i>FOXO3</i> rs4946936   | 80 | CC vs. CT vs. TT<br>p = 10.9                                           | TT + CT vs. CC<br>p = 0.7                             | TT vs. CT + CC<br>p = 0.7                              | TT vs. CC<br>P = 0.7                              |
| <i>IGFBP3</i> rs3110697  | 82 | GG vs. AG vs. AA<br>p = 0.5                                            | AA + AG vs. GG<br>p = 0.4                             | AA vs. AG + GG<br>p = 0.8                              | AA vs. GG<br>p = 0.9                              |
| <i>IGFBP3</i> rs2854744  | 77 | GG vs. GT vs. TT<br>p = 0.5                                            | TT + GT vs. GG<br>p = 0.7                             | TT vs. GT + GG<br>p = 0.2                              | TT vs. GG<br>p = 0.3                              |
| <i>FABP1</i> rs2241883   | 83 | TT vs. CT vs. CC<br>p = 0.5                                            | CC + CT vs. TT<br>p = 0.5                             | CC vs. CT + TT<br>p = 0.5                              | CC vs. TT<br>p = 1.0                              |
| <i>FABP1</i> rs2919872   | 80 | CC vs. CT vs. TT<br>p = 0.06                                           | TT + CT vs. CC<br>p = 0.04 (p <sub>corr</sub> = 0.05) | TT vs. CT + CC<br>p = 0.1                              | TT vs. CC<br>p = 0.06                             |
| <i>PCSK9</i> rs562556    | 82 | AA vs. AG vs. GG<br>p = 0.09                                           | GG + AG vs. AA<br>p = 0.05                            | GG vs. AG + AA<br>p = 0.4                              | GG vs. AA<br>p = 0.6                              |
| <i>PCSK9</i> rs11206510  | 82 | TT vs. CT vs. CC<br>p = 0.1                                            | CC + CT vs. TT<br>p = 0.09                            | CC vs. CT + TT<br>p = 0.4                              | CC vs. TT<br>p = 0.5                              |
| <i>ANGPTL6</i> rs8112063 | 82 | TT vs. CT vs. CC<br>p = 0.8                                            | CC + CT vs. TT<br>p = 0.9                             | CC vs. CT + TT<br>p = 0.5                              | CC vs. TT<br>p = 0.7                              |
| <i>DOCK6</i> rs737337    | 81 | TT vs. CT vs. CC<br>p = 0.01 (p <sub>corr</sub> = 0.1)                 | CC + CT vs. TT<br>p = 0.2                             | CC vs. CT + TT<br>p = 0.006 (p <sub>corr</sub> = 0.08) | CC vs. TT<br>p = 0.006 (p <sub>corr</sub> = 0.09) |
| <i>DOCK6</i> rs17699089  | 80 | AA vs. AG vs. GG<br>p = 0.007 (p <sub>corr</sub> = 0.02)               | GG + AG vs. AA<br>p = 0.09                            | GG vs. AG + AA<br>p = 0.002 (p <sub>corr</sub> = 0.04) | GG vs. AA<br>p = 0.001 (p <sub>corr</sub> = 0.03) |

<sup>1</sup> Multiple-sample test p

<sup>2</sup> Log-rank test p

**Table S11:** Associations between the selected energy homeostasis nucleotide variants and cardiovascular mortality of patients initiating HD therapy evaluated by Kaplan-Meier analysis

| Tested variant           | N  | Major homozygotes vs. heterozygotes vs. minor homozygotes <sup>1</sup> | Dominant mode of inheritance <sup>2</sup>            | Recessive mode of inheritance <sup>2</sup>             | Additive mode of inheritance <sup>2</sup>         |
|--------------------------|----|------------------------------------------------------------------------|------------------------------------------------------|--------------------------------------------------------|---------------------------------------------------|
| <i>FOXO3</i> rs2802292   | 82 | TT vs. GT vs. GG<br>p = 0.4                                            | GG + GT vs. TT<br>p = 0.4                            | GG vs. GT + TT<br>p = 0.2                              | GG vs. TT<br>p = 0.2                              |
| <i>FOXO3</i> rs4946936   | 80 | CC vs. CT vs. TT<br>p = 0.7                                            | TT + CT vs. CC<br>p = 0.4                            | TT vs. CT + CC<br>p = 0.8                              | TT vs. CC<br>p = 0.7                              |
| <i>IGFBP3</i> rs3110697  | 82 | GG vs. AG vs. AA<br>p = 0.05                                           | AA + AG vs. GG<br>p = 0.01 (p <sub>corr</sub> = 1.0) | AA vs. AG + GG<br>p = 0.6                              | AA vs. GG<br>p = 0.05                             |
| <i>IGFBP3</i> rs2854744  | 77 | GG vs. GT vs. TT<br>p = 0.1                                            | TT + GT vs. GG<br>p = 0.2                            | TT vs. GT + GG<br>p = 0.05                             | TT vs. GG<br>p = 0.04 (p <sub>corr</sub> = 1.0)   |
| <i>FABP1</i> rs2241883   | 83 | TT vs. CT vs. CC<br>p = 0.3                                            | CC + CT vs. TT<br>p = 0.9                            | CC vs. CT + TT<br>p = 0.2                              | CC vs. TT<br>p = 0.5                              |
| <i>FABP1</i> rs2919872   | 80 | CC vs. CT vs. TT<br>p = 0.4                                            | TT + CT vs. CC<br>p = 0.2                            | TT vs. CT + CC<br>p = 0.5                              | TT vs. CC<br>p = 0.4                              |
| <i>PCSK9</i> rs562556    | 82 | AA vs. AG vs. GG<br>p = 0.01 (p <sub>corr</sub> = 0.06)                | GG + AG vs. AA<br>p = 0.07                           | GG vs. AG + AA<br>p = 0.03 (p <sub>corr</sub> = 0.08)  | GG vs. AA<br>p = 0.1                              |
| <i>PCSK9</i> rs11206510  | 82 | TT vs. CT vs. CC<br>p = 0.03 (p <sub>corr</sub> = 0.09)                | CC + CT vs. TT<br>p = 0.07                           | CC vs. CT + TT<br>p = 0.1                              | CC vs. TT<br>p = 0.2                              |
| <i>ANGPTL6</i> rs8112063 | 82 | TT vs. CT vs. CC<br>p = 0.9                                            | CC + CT vs. TT<br>p = 0.8                            | CC vs. CT + TT<br>p = 0.7                              | CC vs. TT<br>p = 0.7                              |
| <i>DOCK6</i> rs737337    | 81 | TT vs. CT vs. CC<br>p < 0.001 (p <sub>corr</sub> = 0.02)               | CC + CT vs. TT<br>p = 0.4                            | CC vs. CT + TT<br>p < 0.001 (p <sub>corr</sub> = 0.01) | CC vs. TT<br>p < 0.001 (p <sub>corr</sub> = 0.02) |
| <i>DOCK6</i> rs17699089  | 80 | AA vs. AG vs. GG<br>p < 0.001 (p <sub>corr</sub> = 0.01)               | GG + AG vs. AA<br>p = 0.9                            | GG vs. AG + AA<br>p < 0.001 (p <sub>corr</sub> = 0.03) | GG vs. AA<br>p < 0.001 (p <sub>corr</sub> = 0.04) |

<sup>1</sup> Multiple-sample test p

<sup>2</sup> Log-rank test p



**Table S12:** Associations between the selected energy homeostasis nucleotide variants and cardiac mortality of patients initiating HD therapy evaluated by Kaplan-Meier analysis

| Tested variant           | N  | Major homozygotes vs. heterozygotes vs. minor homozygotes <sup>1</sup> | Dominant mode of inheritance <sup>2</sup>             | Recessive mode of inheritance <sup>2</sup>             | Additive mode of inheritance <sup>2</sup>         |
|--------------------------|----|------------------------------------------------------------------------|-------------------------------------------------------|--------------------------------------------------------|---------------------------------------------------|
| <i>FOXO3</i> rs2802292   | 82 | TT vs. GT vs. GG<br>p = 0.7                                            | GG + GT vs. TT<br>p = 0.4                             | GG vs. GT + TT<br>p = 0.8                              | GG vs. TT<br>p = 0.6                              |
| <i>FOXO3</i> rs4946936   | 80 | CC vs. CT vs. TT<br>p = 0.7                                            | TT + CT vs. CC<br>p = 0.7                             | TT vs. CT + CC<br>p = 0.4                              | TT vs. CC<br>P = 0.5                              |
| <i>IGFBP3</i> rs3110697  | 82 | GG vs. AG vs. AA<br>p = 0.02 (p <sub>corr</sub> = 0.9)                 | AA + AG vs. GG<br>p = 0.009 (p <sub>corr</sub> = 1.0) | AA vs. AG + GG<br>p = 0.9                              | AA vs. GG<br>p = 0.05                             |
| <i>IGFBP3</i> rs2854744  | 77 | GG vs. GT vs. TT<br>p = 0.2                                            | TT + GT vs. GG<br>p = 0.2                             | TT vs. GT + GG<br>p = 0.08                             | TT vs. GG<br>p = 0.06                             |
| <i>FABP1</i> rs2241883   | 83 | TT vs. CT vs. CC<br>p = 0.7                                            | CC + CT vs. TT<br>p = 0.6                             | CC vs. CT + TT<br>p = 0.4                              | CC vs. TT<br>p = 0.4                              |
| <i>FABP1</i> rs2919872   | 80 | CC vs. CT vs. TT<br>p = 0.4                                            | TT + CT vs. CC<br>p = 0.2                             | TT vs. CT + CC<br>p = 0.9                              | TT vs. CC<br>p = 0.8                              |
| <i>PCSK9</i> rs562556    | 82 | AA vs. AG vs. GG<br>p = 0.01 (p <sub>corr</sub> = 0.06)                | GG + AG vs. AA<br>p = 0.2                             | GG vs. AG + AA<br>p = 0.01 (p <sub>corr</sub> = 0.08)  | GG vs. AA<br>p = 0.05                             |
| <i>PCSK9</i> rs11206510  | 82 | TT vs. CT vs. CC<br>p = 0.05                                           | CC + CT vs. TT<br>p = 0.2                             | CC vs. CT + TT<br>p = 0.07                             | CC vs. TT<br>p = 0.1                              |
| <i>ANGPTL6</i> rs8112063 | 82 | TT vs. CT vs. CC<br>p = 0.8                                            | CC + CT vs. TT<br>p = 0.5                             | CC vs. CT + TT<br>p = 0.6                              | CC vs. TT<br>p = 0.5                              |
| <i>DOCK6</i> rs737337    | 81 | TT vs. CT vs. CC<br>p < 0.001 (p <sub>corr</sub> = 0.02)               | CC + CT vs. TT<br>p = 0.2                             | CC vs. CT + TT<br>p < 0.001 (p <sub>corr</sub> = 0.01) | CC vs. TT<br>p < 0.001 (p <sub>corr</sub> = 0.01) |
| <i>DOCK6</i> rs17699089  | 80 | AA vs. AG vs. GG<br>p < 0.001 (p <sub>corr</sub> = 0.005)              | GG + AG vs. AA<br>p = 0.5                             | GG vs. AG + AA<br>p < 0.001 (p <sub>corr</sub> = 0.02) | GG vs. AA<br>p < 0.001 (p <sub>corr</sub> = 0.03) |

<sup>1</sup> Multiple-sample test p

<sup>2</sup> Log-rank test p

**Table S13:** Frequency distributions of the analyzed nucleotide variants in hemodialysis patients in which protein analyses were performed and in those without protein analysis

| Gene symbol | rs number | Patients with measured protein plasma concentrations |               |                   | Patients without measured protein plasma concentrations |               |                   | P value <sup>1</sup> |           |
|-------------|-----------|------------------------------------------------------|---------------|-------------------|---------------------------------------------------------|---------------|-------------------|----------------------|-----------|
|             |           | Major homozygotes                                    | Heterozygotes | Minor homozygotes | Major homozygotes                                       | Heterozygotes | Minor homozygotes |                      |           |
| FOXO3       | rs2802292 | 31 (36.9%)                                           | 39 (46.4%)    | 14 (16.7%)        | 240 (34.2%)                                             | 357 (51.0%)   | 103 (14.7%)       | 0.633                | Dominant  |
|             |           |                                                      |               |                   |                                                         |               |                   | 0.635                | Recessive |
|             |           |                                                      |               |                   |                                                         |               |                   | 0.510                | Additive  |
|             |           |                                                      |               |                   |                                                         |               |                   | 0.359                | Dominant  |
| FOXO3       | rs4946936 | 45 (53.6%)                                           | 28 (33.3%)    | 11 (13.1%)        | 335 (48.3%)                                             | 296 (42.7%)   | 63 (9.1%)         | 0.236                | Recessive |
|             |           |                                                      |               |                   |                                                         |               |                   | 0.469                | Additive  |
|             |           |                                                      |               |                   |                                                         |               |                   | 0.998                | Dominant  |
|             |           |                                                      |               |                   |                                                         |               |                   | 0.747                | Recessive |
| IGFBP3      | rs3110697 | 29 (34.1%)                                           | 40 (47.1%)    | 16 (18.8%)        | 237 (34.1%)                                             | 337 (48.5%)   | 121 (17.4%)       | 0.815                | Additive  |
|             |           |                                                      |               |                   |                                                         |               |                   | 0.504                | Dominant  |
|             |           |                                                      |               |                   |                                                         |               |                   | 0.553                | Recessive |
|             |           |                                                      |               |                   |                                                         |               |                   | 0.457                | Additive  |
| IGFBP3      | rs2854744 | 33 (38.8%)                                           | 40 (47.0%)    | 12 (14.1%)        | 245 (35.2%)                                             | 336 (48.2%)   | 116 (16.6%)       | 0.768                | Dominant  |
|             |           |                                                      |               |                   |                                                         |               |                   | 0.826                | Recessive |
|             |           |                                                      |               |                   |                                                         |               |                   | 0.763                | Additive  |
|             |           |                                                      |               |                   |                                                         |               |                   | 0.873                | Dominant  |
| FABP1       | rs2241883 | 28 (33.3%)                                           | 41 (48.8%)    | 15 (17.9%)        | 244 (35.0%)                                             | 336 (48.1%)   | 118 (16.9%)       | 0.436                | Recessive |
|             |           |                                                      |               |                   |                                                         |               |                   | 0.522                | Additive  |
|             |           |                                                      |               |                   |                                                         |               |                   | 0.448                | Dominant  |
|             |           |                                                      |               |                   |                                                         |               |                   | 0.436                | Recessive |
| FABP1       | rs2919872 | 26 (30.1%)                                           | 44 (52.4%)    | 14 (16.7%)        | 208 (30.1%)                                             | 343 (49.6%)   | 140 (20.3%)       | 0.522                | Additive  |
|             |           |                                                      |               |                   |                                                         |               |                   | 0.448                | Dominant  |
|             |           |                                                      |               |                   |                                                         |               |                   | 0.404 <sup>2</sup>   | Recessive |
|             |           |                                                      |               |                   |                                                         |               |                   | 0.233 <sup>2</sup>   | Additive  |
| PCSK9       | rs562556  | 54 (63.5%)                                           | 28 (32.9%)    | 3 (3.5%)          | 470 (67.6%)                                             | 212 (30.5%)   | 13 (1.9%)         | 0.274                | Dominant  |
|             |           |                                                      |               |                   |                                                         |               |                   | 0.094 <sup>a</sup>   | Recessive |
|             |           |                                                      |               |                   |                                                         |               |                   | 0.181 <sup>2</sup>   | Additive  |
|             |           |                                                      |               |                   |                                                         |               |                   | 0.062                | Dominant  |
| ANGPTL6     | rs8112063 | 34 (40%)                                             | 39 (45.9%)    | 12 (14.1%)        | 204 (29.4%)                                             | 331 (47.6%)   | 160 (23.0%)       | 0.021                | Recessive |
|             |           |                                                      |               |                   |                                                         |               |                   |                      |           |

|   |       |             | Chi-squared test |            |          | Fisher's exact test |             |           | Additive           |           |
|---|-------|-------------|------------------|------------|----------|---------------------|-------------|-----------|--------------------|-----------|
|   |       |             | P                |            |          | P                   |             |           | P                  |           |
| 1 | DOCK6 | rs737337    | 69 (83.1%)       | 12 (14.5%) | 2 (2.4%) | 556 (79.8%)         | 129 (18.5%) | 12 (1.7%) | 0.018              | Additive  |
|   |       |             |                  |            |          |                     |             |           | 0.468              | Dominant  |
|   | DOCK6 | rs176990893 | 61 (74.4%)       | 15 (18.3%) | 6 (7.3%) | 492 (70.2%)         | 184 (26.2%) | 25 (3.6%) | 0.653 <sup>2</sup> | Recessive |
|   |       |             |                  |            |          |                     |             |           | 0.662 <sup>2</sup> | Additive  |
|   |       |             |                  |            |          |                     |             |           | 0.429              | Dominant  |
|   |       |             |                  |            |          |                     |             |           | 0.125 <sup>2</sup> | Recessive |
|   |       |             |                  |            |          |                     |             |           | 0.152 <sup>2</sup> | Additive  |

**Table S14:** Correlations between the plasma concentrations of the studied proteins and survival probability of HD patients in a 3.5-year prospective analysis from June 2016 (n = 86)

| Tested protein | All-cause mortality <sup>1</sup> | Cardiovascular mortality <sup>1</sup> | Cardiac mortality <sup>1</sup> |
|----------------|----------------------------------|---------------------------------------|--------------------------------|
| FOXO3          | p = 0.1                          | p = 0.1                               | p = 1.0                        |
| IGFBP-3        | p = 0.2                          | p = 0.6                               | p = 1.0                        |
| L-FABP         | p = 0.2                          | p = 0.3                               | p = 0.3                        |
| PCSK9          | p = 0.9                          | p = 0.2                               | p = 1.0                        |
| ANGPTL6        | p = 0.8                          | p = 0.8                               | p = 0.09                       |
| ANGPTL8        | p = 0.7                          | p = 0.9                               | p = 0.7                        |

<sup>1</sup> Wald test statistic using a proportional hazards model of Cox

**Table S15:** Comparison of the analyzed nucleotide variants and the serum concentrations of their protein products in HD patients (n = 86)

|                 |             |            | Protein concentrations |                       |                       |                      |           |  |
|-----------------|-------------|------------|------------------------|-----------------------|-----------------------|----------------------|-----------|--|
| Protein         | Gene symbol | rs number  | Major homozygotes      | Heterozygotes         | Minor homozygotes     | P value <sup>1</sup> |           |  |
| FOXO3 [ng/ml]   | FOXO3       | rs2802292  | 65.1 (19.8 – 181.3)    | 66.3 (14.4 – 284.4)   | 62.3 (19.0 – 139.6)   | 0.933                | Dominant  |  |
|                 |             |            |                        |                       |                       | 0.577                | Recessive |  |
|                 |             |            |                        |                       |                       | 0.879                | Additive  |  |
| FOXO3 [ng/ml]   | FOXO3       | rs4946936  | 73.8 (19.8 – 234.2)    | 55.3 (14.4 – 284.4)   | 68.4 (19.0 – 165.1)   | 0.260                | Dominant  |  |
|                 |             |            |                        |                       |                       | 0.720                | Recessive |  |
|                 |             |            |                        |                       |                       | 0.607                | Additive  |  |
| IGFBP-3 [ug/ml] | IGFBP3      | rs3110697  | 2.69 (0.61 – 4.43)     | 2.02 (1.17 – 6.27)    | 2.36 (1.18 – 5.97)    | 0.270                | Dominant  |  |
|                 |             |            |                        |                       |                       | 0.831                | Recessive |  |
|                 |             |            |                        |                       |                       | 0.853                | Additive  |  |
| IGFBP-3 [ug/ml] | IGFBP3      | rs2854744  | 1.99 (1.17 – 6.27)     | 2.29 (0.61 – 4.25)    | 2.75 (2.03 – 4.43)    | 0.243                | Dominant  |  |
|                 |             |            |                        |                       |                       | 0.061                | Recessive |  |
|                 |             |            |                        |                       |                       | 0.336                | Additive  |  |
| L-FABP [ng/ml]  | FABP1       | rs2241883  | 36.9 (4.0 – 114.3)     | 35.2 (5.2 – 107.4)    | 57.9 (13.5 – 91.6)    | 0.331                | Dominant  |  |
|                 |             |            |                        |                       |                       | 0.023                | Recessive |  |
|                 |             |            |                        |                       |                       | 0.085                | Additive  |  |
| L-FABP [ng/ml]  | FABP1       | rs2919872  | 40.3 (4.0 – 114.3)     | 44.9 (5.2 – 91.6)     | 22.4 (9.9 – 88.8)     | 0.400                | Dominant  |  |
|                 |             |            |                        |                       |                       | 0.037                | Recessive |  |
|                 |             |            |                        |                       |                       | 0.074                | Additive  |  |
| PCSK9 [ng/ml]   | PCSK9       | rs562556   | 388.1 (182.7 – 747.0)  | 389.2 (178.5 – 621.1) | 443.6 (191.2 – 522.3) | 0.776                | Dominant  |  |
|                 |             |            |                        |                       |                       | 0.922                | Recessive |  |
|                 |             |            |                        |                       |                       | 0.847                | Additive  |  |
| PCSK9 [ng/ml]   | PCSK9       | rs11206510 | 408.1 (178.5 – 631.7)  | 369.2 (182.7 – 570.6) | 372.4 (335.2 – 747.0) | 0.886                | Dominant  |  |
|                 |             |            |                        |                       |                       | 0.367                | Recessive |  |
|                 |             |            |                        |                       |                       | 0.310                | Additive  |  |
| ANGPTL6 [ng/ml] | ANGPTL6     | rs8112063  | 150.9 (39.9 – 368.7)   | 168.9 (60.9 – 497.2)  | 134.4 (74.2 – 345.6)  | 0.235                | Dominant  |  |
|                 |             |            |                        |                       |                       | 0.729                | Recessive |  |
|                 |             |            |                        |                       |                       | 0.354                | Additive  |  |

|                 |              |             |                       |                        |                          |       |           |
|-----------------|--------------|-------------|-----------------------|------------------------|--------------------------|-------|-----------|
|                 |              |             |                       |                        |                          | 0.312 | Dominant  |
| ANGPTL8 [pg/ml] | <i>DOCK6</i> | rs737337    | 994.6 (69.2 – 2604.4) | 853.6 (259.4 – 1771.2) | 1414.5 (1359.2 – 1469.9) | 0.119 | Recessive |
|                 |              |             |                       |                        |                          | 0.598 | Additive  |
|                 |              |             |                       |                        |                          | 0.770 | Dominant  |
| ANGPTL8 [pg/ml] | <i>DOCK6</i> | rs176990893 | 947.6 (69.2 – 2604.4) | 969.6 (259.4 – 1771.2) | 1113.9 (566.9 – 1469.9)  | 0.769 | Recessive |
|                 |              |             |                       |                        |                          | 0.682 | Additive  |

<sup>1</sup> Mann-Whitney U test

**Table S16:** Epistatic interactions between the analyzed genes with respect to dyslipidemia by K/DOQI in HD patients

| No. of risk genes | Models                                                                                        | Testing balanced accuracy | CVC  | OR-MDR | 95%CI           | p-value <sup>1</sup> |
|-------------------|-----------------------------------------------------------------------------------------------|---------------------------|------|--------|-----------------|----------------------|
| 2                 | <i>FOXO3 rs2802292_ FABP1 rs2241883</i>                                                       | 0.59                      | 6/10 | 0.472  | (0.238 - 0.934) | 0.021                |
| 5                 | <i>FOXO3 rs2802292_ IGFBP3 rs3110697_ FABP1 rs2241883_ FABP1 rs2919872_ ANGPTL6 rs8112063</i> | 0.52                      | 8/10 | 0.302  | (0.032 - 2.886) | 0.275                |

Abbreviations: CVC Cross-validation consistency; OR-MDR odds ratio-multifactor-dimensionality reduction; 95% CI confidence interval 95%.

**Table S17:** Epistatic interactions between the analyzed genes with respect to cardiac mortality in HD patients

| No. of risk genes | Models                                                                                         | Testing balanced accuracy | CVC  | OR-MDR | 95%CI           | p-value <sup>1</sup> |
|-------------------|------------------------------------------------------------------------------------------------|---------------------------|------|--------|-----------------|----------------------|
| 2                 | <i>FOXO3 rs2802292_ DOCK6 rs737337</i>                                                         | 0.66                      | 4/10 | 0.577  | (0.168 - 1.988) | 0.279                |
| 3                 | <i>FOXO3 rs2802292_ DOCK6 rs737337_ DOCK6 rs17699089</i>                                       | 0.63                      | 2/10 | 0.337  | (0.042 - 2.676) | 0.252                |
| 4                 | <i>PCSK9 rs562556 _ PCSK9 rs11206510 _ ANGPTL6 rs8112063 _ DOCK6 rs737337</i>                  | 0.64                      | 4/10 | 0.539  | (0.063 - 4.585) | 0.486                |
| 5                 | <i>IGFBP3 rs2854744_ PCSK9 rs562556 _ PCSK9 rs11206510 _ ANGPTL6 rs8112063_ DOCK6 rs737337</i> | 0.56                      | 3/10 | 0.270  | (0.035 - 2.092) | 0.151                |



**Table S18:** Epistatic interactions between the analyzed genes with respect to CAD in HD patients

| No. of risk genes | Models                                                                    | Testing balanced accuracy | CVC  | OR-MDR | 95%CI           | p-value <sup>1</sup> |
|-------------------|---------------------------------------------------------------------------|---------------------------|------|--------|-----------------|----------------------|
| 2                 | <i>IGFBP3 rs2854744_ DOCK6 rs737337</i>                                   | 0.58                      | 4/10 | 0.322  | (0.038 - 2.744) | 0.259                |
| 3                 | <i>FOXO3 rs2802292_ FOXO3 rs4946936_ FABP1 rs2919872</i>                  | 0.56                      | 3/10 | 0.537  | (0.197 - 1.462) | 0.157                |
| 4                 | <i>FOXO3 rs4946936_ IGFBP3 rs2854744_ FABP1 rs2919872_ DOCK6 rs737337</i> | 0.59                      | 9/10 | 0.322  | (0.071 - 1.460) | 0.101                |

**Table S19:** Epistatic interactions between the analyzed genes with respect to diabetes in HD patients

| No. of risk genes | Models                                                                      | Testing balanced accuracy | CVC  | OR-MDR | 95%CI            | p-value <sup>1</sup> |
|-------------------|-----------------------------------------------------------------------------|---------------------------|------|--------|------------------|----------------------|
| 2                 | <i>DOCK6 rs737337_ DOCK6 rs17699089</i>                                     | 0.64                      | 3/10 | 2.241  | (0.318 - 15.812) | 0.914                |
| 3                 | <i>IGFBP3 rs3110697_ IGFBP3 rs2854744_ DOCK6 rs737337</i>                   | 0.64                      | 3/10 | 0.659  | (0.246" "1.765)  | 0.280                |
| 4                 | <i>IGFBP3 rs3110697_ FABP1 rs2919872_ ANGPTL6 rs8112063_ DOCK6 rs737337</i> | 0.60                      | 3/10 | 0.320  | (0.073 - 1.397)  | 0.085                |

## Plasma L-FABP concentrations

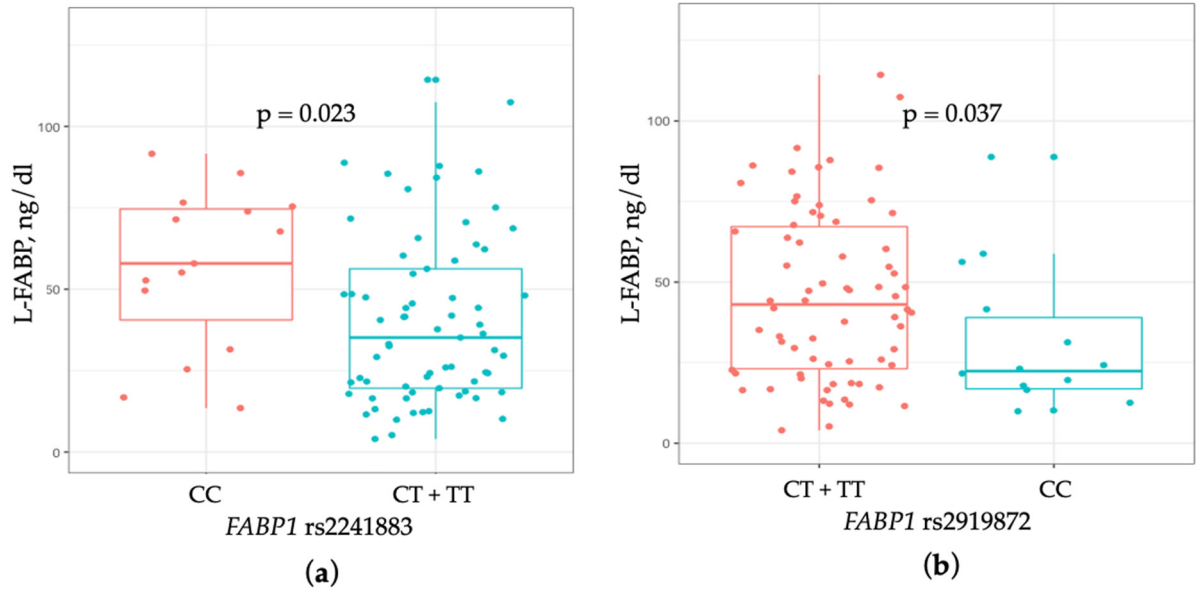

**Figure S1:** L-FABP plasma concentrations according to the analyzed nucleotide variants: (a) *FABP1* rs2241883 in the recessive mode of inheritance; (b) *FABP1* rs2919872 in the dominant mode of inheritance
